# Supplementary material
Source: PubMed Central journal article supplement (PMC6331328)
Supplement: JZUSB20-0105-ESM.pdf [file JZUSB20-0105-ESM.pdf]

## A frameshift mutation in exon 19 of *MLH1* in a Chinese Lynch syndrome family: a pedigree study<sup>#</sup>

Qiao-qi SUI<sup>§1,3</sup>, Wu JIANG<sup>§1,3</sup>, Xiao-dan WU<sup>1,3</sup>, Yi-hong LING<sup>2,3</sup>, Zhi-zhong PAN<sup>†‡1,3</sup>, Pei-rong DING<sup>†‡1,3</sup>

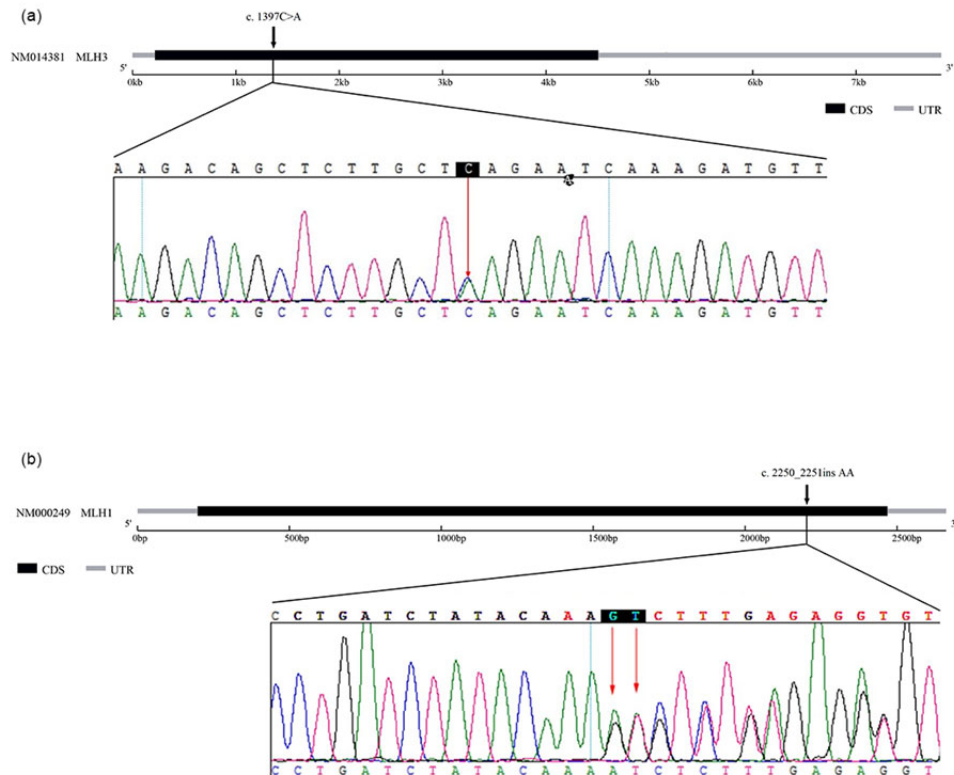

**Fig. S1 Sequencing of the proband**

(a) Heterozygous substitution of 1 bp (c.1397C>A) was detected in exon 1 of *MLH3* gene. (b) Heterozygous frameshift mutation in exon 19 of *MLH1* gene (c.2250\_2251insAA) was detected

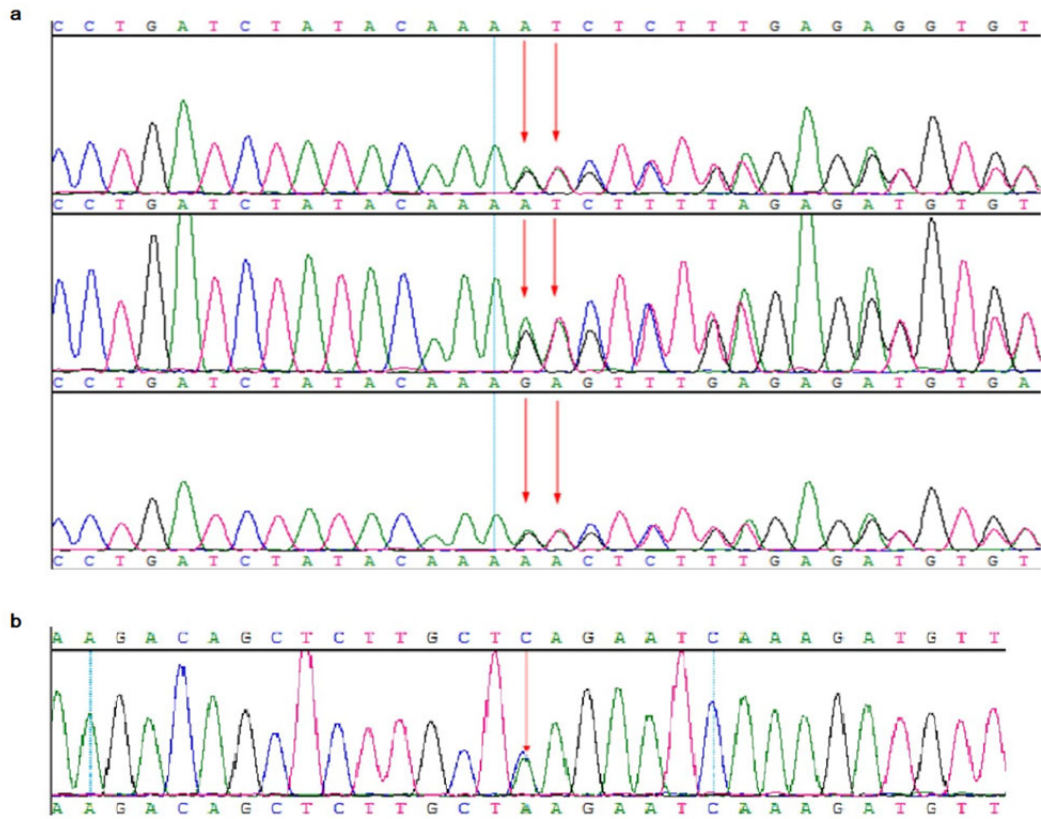

**Fig. S2 Sequencing of the patients of the Lynch syndrome pedigree**

(a) Frameshift mutations in exon 19 of *MLH1* gene were detected among the proband's brother, his niece and his mother respectively. (b) Heterozygous substitution of 1 bp in exon 1 of *MLH3* gene was detected in the proband's father
